# Supplementary material
Source: Research Square preprint supplement (doi:10.21203/rs.3.rs-9408464/v1)
Supplement: Supplementary file 1 [file 0de867b58bf90f81e918430d.docx]

Supplementary material

Gesture question:

“How important is the gestural aspect of smoking for you when you smoke (e.g., holding the cigarette between the fingers, bringing it to the mouth, manipulating it while smoking)?”

Response scale:

1 = Not important at all
2 = Slightly important
3 = Mildly important
4 = Moderately important
5 = Quite important
6 = Very important
7 = Extremely important
